# Supplementary material
Source: PubMed Central journal article supplement (PMC1413912)
Supplement: pnas_0511150103_1.pdf [file pnas_0511150103_1.pdf]

a

**Boston dataset**  
top 100 markers AMKL vs M4/M5

**St. Jude Dataset**  
rank ordered markers AMKL vs M4/M5

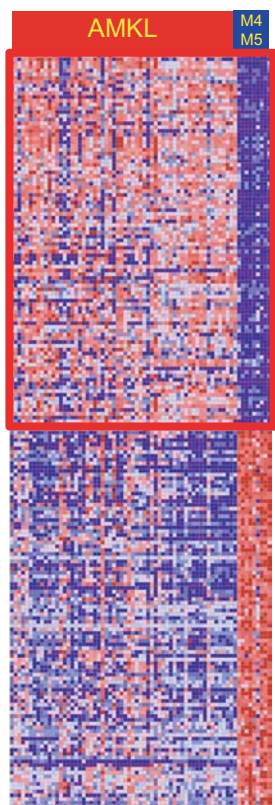

gene set

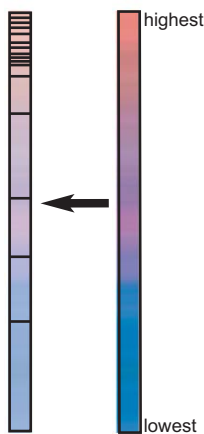

GSEA

b

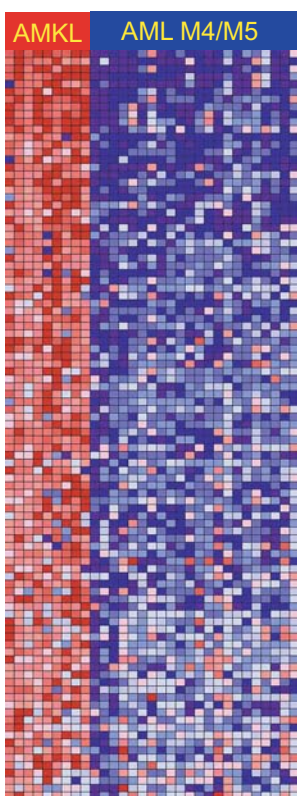

| Probe       | Gene          | Rank |
|-------------|---------------|------|
| 206494_s_at | ITGA2B        | 0    |
| 206698_at   | XK            | 1    |
| 216956_s_at | ITGA2B        | 2    |
| 206283_s_at | TAL1          | 3    |
| 206145_at   | RHAG          | 4    |
| 207550_at   | MPL           | 5    |
| 206493_at   | ITGA2B        | 6    |
| 213549_at   | null          | 8    |
| 208029_s_at | LAPTM4B       | 9    |
| 214039_s_at | LAPTM4B       | 11   |
| 206655_s_at | GP1BB         | 12   |
| 206306_at   | RYR3          | 13   |
| 209839_at   | DNM3          | 14   |
| 212148_at   | PBX1          | 15   |
| 212224_at   | ALDH1A1       | 16   |
| 217975_at   | WBP5          | 17   |
| 205352_at   | SERPINI1      | 18   |
| 208767_s_at | LAPTM4B       | 19   |
| 201150_s_at | TIMP3         | 20   |
| 201147_s_at | TIMP3         | 23   |
| 201830_s_at | NET1          | 24   |
| 202949_s_at | FHL2          | 25   |
| 207808_s_at | PROS1         | 29   |
| 210762_s_at | DLC1          | 30   |
| 212372_at   | MYH10         | 31   |
| 203544_s_at | STAM          | 35   |
| 204720_s_at | DNAJC6        | 38   |
| 207389_at   | GP1BA         | 41   |
| 203333_at   | KIFAP3        | 43   |
| 215388_s_at | CFHL1 /// CFH | 44   |
| 202932_at   | YES1          | 45   |
| 210986_s_at | TPM1          | 46   |
| 202746_at   | ITM2A         | 49   |
| 207781_s_at | ZNF6          | 50   |
| 203304_at   | BAMBI         | 52   |
| 220591_s_at | EFHC2         | 54   |
| 211005_at   | LAT           | 57   |
| 203987_at   | FZD6          | 59   |
| 217963_s_at | NGFRAP1       | 61   |
| 216054_x_at | MYL4          | 64   |
| 202351_at   | ITGAV         | 67   |
| 215047_at   | BIA2          | 71   |
| 219412_at   | RAB38         | 78   |
| 220110_s_at | NXF3          | 79   |
| 211137_s_at | ATP2C1        | 87   |
| 212151_at   | PBX1          | 96   |
| 211254_x_at | RHAG          | 99   |
| 201334_s_at | ARHGEF12      | 100  |
| 202619_s_at | PLOD2         | 107  |
| 213107_at   | TNFK          | 109  |
| 210038_at   | PRKCCQ        | 115  |
| 217936_at   | ARHGAP5       | 118  |
| 218236_s_at | PRKD3         | 121  |
| 205278_at   | GAD1          | 144  |
| 219737_s_at | PCDH9         | 145  |
| 202747_s_at | ITM2A         | 146  |
| 211828_s_at | TNFK          | 159  |
| 202806_at   | DBN1          | 160  |
| 212190_at   | SERPINE2      | 162  |
| 204187_at   | GMPR          | 177  |
| 208407_s_at | CTNND1        | 180  |
| 210987_x_at | TPM1          | 192  |
| 202728_s_at | LTBP1         | 194  |
| 202732_at   | PKIG          | 199  |
| 213800_at   | CFH           | 223  |
| 204529_s_at | TOX           | 238  |
| 201906_s_at | CTDSPL        | 239  |
| 218718_at   | PDGFC         | 248  |
| 203972_s_at | PEX3          | 254  |
| 202478_at   | TRIB2         | 266  |
| 205127_at   | PTGS1         | 272  |
| 209524_at   | HDGFRP3       | 278  |
| 210039_s_at | PRKCCQ        | 299  |
| 212558_at   | SPRY1         | 316  |
| 204917_s_at | MLLT3         | 317  |
| 209526_s_at | HDGFRP3       | 319  |
| 212589_at   | RRAS2         | 343  |
| 212599_at   | AUTS2         | 359  |
| 216693_x_at | HDGFRP3       | 363  |
| 214109_at   | LRBA          | 366  |
| 211071_s_at | AF1Q          | 378  |
| 209723_at   | SERPINB9      | 427  |
| 209362_at   | SURB7         | 458  |
| 220773_s_at | GPHN          | 542  |
| 213288_at   | OACT2         | 546  |
| 215239_x_at | ZNF273        | 547  |
| 213109_at   | TNFK          | 585  |
| 202481_at   | DHRS3         | 615  |
| 212905_at   | CSTF2T        | 711  |
| 214464_at   | CDC42BPA      | 730  |
| 212222_at   | PSME4         | 885  |
| 212590_at   | RRAS2         | 889  |
| 209574_s_at | C18orf1       | 952  |
| 211084_x_at | PRKD3         | 990  |
| 204937_s_at | ZNF274        | 1068 |
| 212231_at   | FBXO21        | 1146 |
| 220927_s_at | HPSE2         | 1335 |
| 206118_at   | STAT4         | 2610 |
| 205171_at   | PTPN4         | 3443 |

c

|                                                           | top 100 markers up in |          | top 100 markers up in |         |
|-----------------------------------------------------------|-----------------------|----------|-----------------------|---------|
|                                                           | AMKL                  | M4/M5    | AMKL                  | M4/M5   |
| direction:                                                |                       |          |                       |         |
| query = 100 top markers in dataset (rank ordered markers) | Boston                | Boston   | St Jude               | St Jude |
|                                                           | St. Jude              | St. Jude | Boston                | Boston  |
| n hits in top 100 from test dataset                       | 50                    | 47       | 49                    | 47      |
| Enrichment score                                          | 0.95                  | 0.96     | 0.96                  | 0.96    |
| nominal p-value                                           | 0.001                 | 0.001    | 0.001                 | 0.001   |
